# Supplementary material for: The Learning Transfer of Dementia Training Program Participants: Its Antecedents and Mediating Effect on the Job Competency of Geriatric Caregivers
Source: MDPI journal article supplement (doi:10.3390/healthcare11222991), 2023-11-19
Supplement: s1 [file s1]

## Supplementary

Learning Transfer of the Dementia Training Program Participants: Its Antecedents and Mediating Effect on Job Competency of Geriatric Caregivers

### Supplementary S1: Dementia Specialist Training Curriculum

#### (1) Basic Course - 40 Hours

The basic course in dementia specialist training consists of 40 hours and covers topics such as symptoms of dementia, treatment of dementia, fundamentals of dementia care, dementia care techniques, family caregiving for dementia, observation, and record-keeping.

| Course                          | Contents                                     |
|---------------------------------|----------------------------------------------|
| <b>Orientation</b>              | Understanding Dementia Specialist Training   |
| <b>Understanding Dementia</b>   | Symptoms of Dementia                         |
|                                 | Concept and Types of Dementia                |
|                                 | Cognitive Symptoms of Dementia               |
|                                 | Behavioral Symptoms of Dementia              |
|                                 | Physical Symptoms of Dementia                |
|                                 | Treatment of Dementia                        |
|                                 | Cognitive Function Improvement               |
|                                 | Treatment of Behavioral Symptoms             |
|                                 | Non-Pharmacological Treatment                |
|                                 |                                              |
| <b>Understanding Caregiving</b> | Fundamentals of Dementia Care                |
|                                 | Goals and Principles of Caregiving           |
|                                 | Caregiver Ethics                             |
|                                 | Dementia Care Techniques                     |
|                                 | Communication and Relationship Building      |
|                                 | Daily Life Care                              |
|                                 | Utilizing Welfare Devices                    |
|                                 | Care for Behavioral Symptoms                 |
|                                 | Care for Physical Symptoms                   |
|                                 | Nutrition Management                         |
|                                 | Emergency Care                               |
|                                 | Dementia Family Care                         |
|                                 | Understanding Dementia Families              |
|                                 | Support Services for Dementia Families       |
|                                 | Observation and Recording                    |
|                                 | Recording for Dementia Patients and Families |

#### (2) Facility Course - 20 Hours

The facility course is intended for caregivers in residential care facilities, including those working in day and night care settings. It focuses on providing care for elderly individuals with dementia within a facility setting.

| Course               | Contents                                                 |
|----------------------|----------------------------------------------------------|
| <b>Facility Care</b> | Introduction to Dementia Care in Facilities              |
|                      | Goals and Principles of Dementia Care in Facilities      |
|                      | Practical Aspects of Relationship Building: Case Studies |
|                      | Dementia Care Techniques in Facilities                   |
|                      | Facility Environment and Safety Management               |
|                      | Implementation of Activities to Enhance Daily Life       |
|                      | Implementation of Cognitive Stimulation Activities       |
|                      | Implementation of Physical Stimulation Activities        |

## Care for End-Stage Dementia Patients

## Practical Aspects of Dementia Patient Records in Facilities

**Supplementary S2: Mediating Effect of Learning Transfer (Near, Far) on Job Competency****<Table S1> Results of the Mediating Effect of Near Learning Transfer on Communication Competency (n=279)**

|                     | Model                    | Level 1                                     |          | Level 2                                     |          | Level 3                                             |          |
|---------------------|--------------------------|---------------------------------------------|----------|---------------------------------------------|----------|-----------------------------------------------------|----------|
|                     |                          | B                                           | t        | B                                           | t        | B                                                   | t        |
|                     | (Constant)               |                                             | 2.394    |                                             | 2.756    |                                                     | 2.011    |
| Control variable    | Sex (Male_dum)           | -.117                                       | -1.948   | .005                                        | .081     | .050                                                | .822     |
|                     | Age                      | .008                                        | .143     | .028                                        | .488     | .025                                                | .466     |
|                     | Training level           | .043                                        | .761     | .087                                        | 1.434    | .070                                                | 1.241    |
|                     | Work experience          | -.024                                       | -.448    | -.056                                       | -.973    | -.047                                               | -.869    |
|                     | Training experience      | .000                                        | -.002    | .075                                        | 1.335    | .075                                                | 1.427    |
|                     | Monthly income           | .072                                        | 1.028    | -.017                                       | -.227    | -.045                                               | -.633    |
|                     | Training point           | .013                                        | .259     | -.004                                       | -.075    | -.009                                               | -.178    |
|                     | Work type (Facility_dum) | .098                                        | 1.322    | -.074                                       | -.939    | -.112                                               | -1.500   |
| Antecedent variable | Learning motivation      | -.038                                       | -.648    | -.022                                       | -.345    | -.007                                               | -.122    |
|                     | Self-efficacy            | .131                                        | 2.032*   | .179                                        | 2.598*   | .129                                                | 1.986*   |
|                     | Training content         | .019                                        | .283     | .020                                        | .271     | .012                                                | .182     |
|                     | Training method          | .101                                        | 1.382    | -.044                                       | -.563    | -.083                                               | -1.122   |
|                     | Role of instructor       | .101                                        | 1.296    | .284                                        | 3.415**  | .246                                                | 3.144**  |
|                     | Manager support          | -.107                                       | -1.431   | -.053                                       | -.659    | -.012                                               | -.159    |
|                     | Peer support             | .076                                        | 1.174    | .111                                        | 1.594    | .082                                                | 1.252    |
|                     | Transfer opportunity     | .300                                        | 4.775*** | .043                                        | .641     | -.071                                               | -1.085   |
|                     | Transfer intention       | .275                                        | 4.152*** | .317                                        | 4.478*** | .213                                                | 3.103**  |
| Mediating variable  | Near transfer            |                                             |          |                                             |          | .382                                                | 6.144*** |
| Goodness of fit     |                          | F=10.586***,<br>R2=.408<br>(Adjusted, .370) |          | F= 7.229***,<br>R2=.320<br>(Adjusted,.276), |          | F= 9.885***,<br>R2=.406(Adjusted,.365),<br>ΔR2=.086 |          |

\* p&lt;.05, \*\* p&lt;.01, \*\*\* p&lt;.001

&lt;Table S2&gt; Results of the Mediating Effect of Near Learning Transfer on Problem-solving Competency (n=279)

|                     | Model                    | Level 1                                     |          | Level 2                                     |          | Level 3                                             |         |
|---------------------|--------------------------|---------------------------------------------|----------|---------------------------------------------|----------|-----------------------------------------------------|---------|
|                     |                          | B                                           | t        | B                                           | t        | B                                                   | t       |
|                     | (Constant)               |                                             | 2.394    |                                             | 3.319    |                                                     | 2.608   |
| Control variable    | Sex (Male_dum)           | -.117                                       | -1.948   | -.067                                       | -1.023   | -.022                                               | -.351   |
|                     | Age                      | .008                                        | .143     | -.029                                       | -.500    | -.032                                               | -.588   |
|                     | Training level           | .043                                        | .761     | .095                                        | 1.554    | .078                                                | 1.369   |
|                     | Work experience          | -.024                                       | -.448    | -.104                                       | -1.799   | -.095                                               | -1.750  |
|                     | Training experience      | .000                                        | -.002    | .025                                        | .449     | .025                                                | .480    |
|                     | Monthly income           | .072                                        | 1.028    | .106                                        | 1.395    | .078                                                | 1.097   |
|                     | Training point           | .013                                        | .259     | -.027                                       | -.493    | -.032                                               | -.624   |
|                     | Work type (Facility_dum) | .098                                        | 1.322    | .066                                        | .826     | .029                                                | .380    |
| Antecedent variable | Learning motivation      | -.038                                       | -.648    | -.140                                       | -2.177*  | -.125                                               | -2.077  |
|                     | Self-efficacy            | .131                                        | 2.032*   | .248                                        | 3.557*** | .198                                                | 3.004** |
|                     | Training content         | .019                                        | .283     | -.024                                       | -.335    | -.032                                               | -.465   |
|                     | Training method          | .101                                        | 1.382    | -.095                                       | -1.206   | -.134                                               | -1.804  |
|                     | Role of instructor       | .101                                        | 1.296    | .190                                        | 2.261*   | .151                                                | 1.917   |
|                     | Manager support          | -.107                                       | -1.431   | .102                                        | 1.257    | .143                                                | 1.877   |
|                     | Peer support             | .076                                        | 1.174    | .020                                        | .285     | -.009                                               | -.141   |
|                     | Transfer opportunity     | .300                                        | 4.775*** | .167                                        | 2.454*   | .052                                                | .777    |
|                     | Transfer intention       | .275                                        | 4.152*** | .223                                        | 3.117**  | .117                                                | 1.698   |
| Mediating variable  | Near transfer            |                                             |          |                                             | .384     | 6.125***                                            |         |
| Goodness of fit     |                          | F=10.586***,<br>R2=.408<br>(Adjusted, .370) |          | F= 6.819***,<br>R2=.308<br>(Adjusted,.262), |          | F= 9.426***,<br>R2=.395(Adjusted,.353),<br>ΔR2=.087 |         |

\* p&lt;.05, \*\* p&lt;.01, \*\*\* p&lt;.001

&lt;Table S3&gt; Results of the Mediating Effect of Near Learning Transfer on Self-development Competency (n=279)

|                     | Model                    | Level 1                                     |          | Level 2                                     |          | Level 3                                              |          |
|---------------------|--------------------------|---------------------------------------------|----------|---------------------------------------------|----------|------------------------------------------------------|----------|
|                     |                          | B                                           | t        | B                                           | t        | B                                                    | t        |
|                     | (Constant)               |                                             | 2.394    |                                             | .666     |                                                      | -.053    |
| Control variable    | Sex (Male_dum)           | -.117                                       | -1.948   | -.213                                       | -3.437** | -.177                                                | -2.964** |
|                     | Age                      | .008                                        | .143     | .071                                        | 1.308    | .069                                                 | 1.324    |
|                     | Training level           | .043                                        | .761     | .130                                        | 2.242*   | .117                                                 | 2.104*   |
|                     | Work experience          | -.024                                       | -.448    | -.050                                       | -.904    | -.042                                                | -.805    |
|                     | Training experience      | .000                                        | -.002    | .101                                        | 1.887    | .101                                                 | 1.975*   |
|                     | Monthly income           | .072                                        | 1.028    | .200                                        | 2.768**  | .178                                                 | 2.568*   |
|                     | Training point           | .013                                        | .259     | .014                                        | .272     | .010                                                 | .203     |
|                     | Work type (Facility_dum) | .098                                        | 1.322    | .246                                        | 3.239**  | .216                                                 | 2.965**  |
| Antecedent variable | Learning motivation      | -.038                                       | -.648    | .156                                        | 2.561*   | .168                                                 | 2.880**  |
|                     | Self-efficacy            | .131                                        | 2.032*   | .142                                        | 2.140*   | .101                                                 | 1.590    |
|                     | Training content         | .019                                        | .283     | -.046                                       | -.668    | -.052                                                | -.787    |
|                     | Training method          | .101                                        | 1.382    | -.187                                       | -2.493*  | -.219                                                | -3.030** |
|                     | Role of instructor       | .101                                        | 1.296    | .051                                        | .637     | .020                                                 | .260     |
|                     | Manager support          | -.107                                       | -1.431   | .008                                        | .098     | .041                                                 | .548     |
|                     | Peer support             | .076                                        | 1.174    | .271                                        | 4.063*** | .248                                                 | 3.872*** |
|                     | Transfer opportunity     | .300                                        | 4.775*** | .116                                        | 1.795    | .024                                                 | .366     |
|                     | Transfer intention       | .275                                        | 4.152*** | .275                                        | 4.042*** | .190                                                 | 2.835**  |
| Mediating variable  | Near transfer            |                                             |          |                                             |          | .308                                                 | 5.063*** |
| Goodness of fit     |                          | F=10.586***,<br>R²=.408<br>(Adjusted, .370) |          | F= 9.175***,<br>R²=.374<br>(Adjusted,..333) |          | F= 10.907***,<br>R²=.430(Adjusted,.391),<br>ΔR²=.056 |          |

\* p&lt;.05, \*\* p&lt;.01, \*\*\* p&lt;.001

&lt;Table S4&gt; Results of the Mediating Effect of Near Learning Transfer on Interpersonal Relationship Competency (n=279)

|                     | Model                    | Level 1                                     |          | Level 2                                    |           | Level 3                                              |           |
|---------------------|--------------------------|---------------------------------------------|----------|--------------------------------------------|-----------|------------------------------------------------------|-----------|
|                     |                          | B                                           | t        | B                                          | t         | B                                                    | t         |
|                     | (Constant)               |                                             | 2.394    |                                            | 1.119     |                                                      | .489      |
| Control variable    | Sex (Male_dum)           | -.117                                       | -1.948   | -.251                                      | -4.094*** | -.219                                                | -3.674*** |
|                     | Age                      | .008                                        | .143     | -.019                                      | -.352     | -.021                                                | -.404     |
|                     | Training level           | .043                                        | .761     | .136                                       | 2.377*    | .125                                                 | 2.249*    |
|                     | Work experience          | -.024                                       | -.448    | -.072                                      | -1.320    | -.066                                                | -1.242    |
|                     | Training experience      | .000                                        | -.002    | .082                                       | 1.539     | .082                                                 | 1.595     |
|                     | Monthly income           | .072                                        | 1.028    | .124                                       | 1.728     | .104                                                 | 1.502     |
|                     | Training point           | .013                                        | .259     | -.002                                      | -.034     | -.005                                                | -.107     |
|                     | Work type (Facility_dum) | .098                                        | 1.322    | .261                                       | 3.465**   | .234                                                 | 3.212**   |
| Antecedent variable | Learning motivation      | -.038                                       | -.648    | .080                                       | 1.321     | .090                                                 | 1.547     |
|                     | Self-efficacy            | .131                                        | 2.032*   | .132                                       | 2.011*    | .096                                                 | 1.507     |
|                     | Training content         | .019                                        | .283     | .051                                       | .743      | .046                                                 | .691      |
|                     | Training method          | .101                                        | 1.382    | -.023                                      | -.308     | -.050                                                | -.700     |
|                     | Role of instructor       | .101                                        | 1.296    | -.005                                      | -.063     | -.032                                                | -.424     |
|                     | Manager support          | -.107                                       | -1.431   | .047                                       | .620      | .076                                                 | 1.036     |
|                     | Peer support             | .076                                        | 1.174    | .215                                       | 3.256**   | .194                                                 | 3.039**   |
|                     | Transfer opportunity     | .300                                        | 4.775*** | .044                                       | .685      | -.038                                                | -.593     |
|                     | Transfer intention       | .275                                        | 4.152*** | .295                                       | 4.382***  | .220                                                 | 3.279**   |
| Mediating variable  | Near transfer            |                                             |          |                                            | .273      | 4.491***                                             |           |
| Goodness of fit     |                          | F=10.586***,<br>R²=.408<br>(Adjusted, .370) |          | F= 9.709***,<br>R²=.387<br>(Adjusted,.347) |           | F= 10.963***,<br>R²=.431(Adjusted,.392),<br>ΔR²=.044 |           |

\* p&lt;.05, \*\* p&lt;.01, \*\*\* p&lt;.001

&lt;Table S5&gt; Results of the Mediating Effect of Near Learning Transfer on Skill Competency (n=279)

|                     | Model                    | Level 1                                     |          | Level 2                                    |          | Level 3                                             |          |
|---------------------|--------------------------|---------------------------------------------|----------|--------------------------------------------|----------|-----------------------------------------------------|----------|
|                     |                          | B                                           | t        | B                                          | t        | B                                                   | t        |
|                     | (Constant)               |                                             | 2.394    |                                            | 2.726    |                                                     | 2.085    |
| Control variable    | Sex (Male_dum)           | -.117                                       | -1.948   | -.109                                      | -1.667   | -.071                                               | -1.132   |
|                     | Age                      | .008                                        | .143     | .039                                       | .680     | .037                                                | .666     |
|                     | Training level           | .043                                        | .761     | .093                                       | 1.509    | .079                                                | 1.340    |
|                     | Work experience          | -.024                                       | -.448    | -.069                                      | -1.184   | -.061                                               | -1.098   |
|                     | Training experience      | .000                                        | -.002    | -.049                                      | -.863    | -.049                                               | -.901    |
|                     | Monthly income           | .072                                        | 1.028    | .077                                       | 1.003    | .053                                                | .728     |
|                     | Training point           | .013                                        | .259     | .027                                       | .485     | .022                                                | .426     |
|                     | Work type (Facility_dum) | .098                                        | 1.322    | .078                                       | .966     | .046                                                | .599     |
| Antecedent variable | Learning motivation      | -.038                                       | -.648    | .042                                       | .645     | .054                                                | .874     |
|                     | Self-efficacy            | .131                                        | 2.032*   | .167                                       | 2.381*   | .125                                                | 1.845    |
|                     | Training content         | .019                                        | .283     | -.066                                      | -.895    | -.072                                               | -1.023   |
|                     | Training method          | .101                                        | 1.382    | .112                                       | 1.403    | .079                                                | 1.035    |
|                     | Role of instructor       | .101                                        | 1.296    | .081                                       | .961     | .049                                                | .601     |
|                     | Manager support          | -.107                                       | -1.431   | .143                                       | 1.754    | .177                                                | 2.266*   |
|                     | Peer support             | .076                                        | 1.174    | -.053                                      | -.747    | -.077                                               | -1.140   |
|                     | Transfer opportunity     | .300                                        | 4.775*** | .035                                       | .507     | -.062                                               | -.908    |
|                     | Transfer intention       | .275                                        | 4.152*** | .265                                       | 3.684*** | .177                                                | 2.484*   |
| Mediating variable  | Near transfer            |                                             |          |                                            |          | .322                                                | 4.996*** |
| Goodness of fit     |                          | F=10.586***,<br>R²=.408<br>(Adjusted, .370) |          | F= 6.563***,<br>R²=.299<br>(Adjusted,.254) |          | F= 8.154***,<br>R²=.361(Adjusted,.317),<br>ΔR²=.061 |          |

\* p&lt;.05, \*\* p&lt;.01, \*\*\* p&lt;.001

&lt;Table S6&gt; Results of the Mediating Effect of Near Learning Transfer on Work Ethics Competency (n=279)

|                     | Model                    | Level 1                                     |          | Level 2                                     |         | Level 3                                           |          |
|---------------------|--------------------------|---------------------------------------------|----------|---------------------------------------------|---------|---------------------------------------------------|----------|
|                     |                          | B                                           | t        | B                                           | t       | B                                                 | t        |
|                     | (Constant)               |                                             | 2.394    |                                             | 6.824   |                                                   | 6.331    |
| Control variable    | Sex (Male_dum)           | -.117                                       | -1.948   | -.031                                       | -.459   | .005                                              | .081     |
|                     | Age                      | .008                                        | .143     | .078                                        | 1.318   | .076                                              | 1.328    |
|                     | Training level           | .043                                        | .761     | .067                                        | 1.070   | .054                                              | .892     |
|                     | Work experience          | -.024                                       | -.448    | .107                                        | 1.785   | .114                                              | 1.981    |
|                     | Training experience      | .000                                        | -.002    | -.151                                       | -2.596* | -.151                                             | -2.695** |
|                     | Monthly income           | .072                                        | 1.028    | .125                                        | 1.594   | .103                                              | 1.358    |
|                     | Training point           | .013                                        | .259     | -.073                                       | -1.300  | -.077                                             | -1.424   |
|                     | Work type (Facility_dum) | .098                                        | 1.322    | .022                                        | .262    | -.009                                             | -.107    |
| Antecedent variable | Learning motivation      | -.038                                       | -.648    | .164                                        | 2.483*  | .176                                              | 2.761**  |
|                     | Self-efficacy            | .131                                        | 2.032*   | -.093                                       | -1.297  | -.134                                             | -1.914   |
|                     | Training content         | .019                                        | .283     | -.067                                       | -.894   | -.073                                             | -1.010   |
|                     | Training method          | .101                                        | 1.382    | .024                                        | .288    | -.008                                             | -.096    |
|                     | Role of instructor       | .101                                        | 1.296    | -.099                                       | -1.143  | -.130                                             | -1.553   |
|                     | Manager support          | -.107                                       | -1.431   | .057                                        | .685    | .090                                              | 1.117    |
|                     | Peer support             | .076                                        | 1.174    | .147                                        | 2.027*  | .124                                              | 1.764    |
|                     | Transfer opportunity     | .300                                        | 4.775*** | .135                                        | 1.922   | .042                                              | .602     |
|                     | Transfer intention       | .275                                        | 4.152*** | .249                                        | 3.363** | .164                                              | 2.230*   |
| Mediating variable  | Near transfer            |                                             |          |                                             |         | .308                                              | 4.630*** |
| Goodness of fit     |                          | F=10.586***,<br>R²=.408<br>(Adjusted, .370) |          | F= 5.437***,<br>R²=.262<br>(Adjusted,.213), |         | F=6.728***,<br>R²=.318(Adjusted,.271)<br>ΔR²=.056 |          |

\* p&lt;.05, \*\* p&lt;.01, \*\*\* p&lt;.001

&lt;Table S7&gt; Results of the Mediating Effect of Far Learning Transfer on Communication Competency (n=279)

| Model               |                          | Level 1                                               |          | Level 2                                                  |          | Level 3                                                                  |          |
|---------------------|--------------------------|-------------------------------------------------------|----------|----------------------------------------------------------|----------|--------------------------------------------------------------------------|----------|
|                     |                          | B                                                     | t        | B                                                        | t        | B                                                                        | t        |
| (Constant)          |                          |                                                       | 1.000    |                                                          | 2.756    |                                                                          | 2.562    |
| Control variable    | Sex (Male_dum)           | -.093                                                 | -1.556   | .005                                                     | .081     | .037                                                                     | .597     |
|                     | Age                      | .006                                                  | .120     | .028                                                     | .488     | .026                                                                     | .473     |
|                     | Training level           | .040                                                  | .707     | .087                                                     | 1.434    | .073                                                                     | 1.273    |
|                     | Work experience          | -.129                                                 | -2.413*  | -.056                                                    | -.973    | -.012                                                                    | -.223    |
|                     | Training experience      | .092                                                  | 1.763    | .075                                                     | 1.335    | .044                                                                     | .816     |
|                     | Monthly income           | .140                                                  | 2.001*   | -.017                                                    | -.227    | -.065                                                                    | -.894    |
|                     | Training point           | -.094                                                 | -1.863   | -.004                                                    | -.075    | .028                                                                     | .534     |
|                     | Work type (Facility_dum) | .119                                                  | 1.620    | -.074                                                    | -.939    | -.115                                                                    | -1.515   |
| Antecedent variable | Learning motivation      | .023                                                  | .387     | -.022                                                    | -.345    | -.030                                                                    | -.490    |
|                     | Self-efficacy            | .125                                                  | 1.938    | .179                                                     | 2.598*   | .137                                                                     | 2.076*   |
|                     | Training content         | -.069                                                 | -1.027   | .020                                                     | .271     | .043                                                                     | .624     |
|                     | Training method          | .152                                                  | 2.080*   | -.044                                                    | -.563    | -.095                                                                    | -1.268   |
|                     | Role of instructor       | .168                                                  | 2.172*   | .284                                                     | 3.415**  | .227                                                                     | 2.847**  |
|                     | Manager support          | -.086                                                 | -1.150   | -.053                                                    | -.659    | -.024                                                                    | -.312    |
|                     | Peer support             | .121                                                  | 1.863    | .111                                                     | 1.594    | .070                                                                     | 1.053    |
|                     | Transfer opportunity     | .122                                                  | 1.945    | .043                                                     | .641     | .002                                                                     | .030     |
|                     | Transfer intention       | .370                                                  | 5.609*** | .317                                                     | 4.478*** | .192                                                                     | 2.696**  |
| Mediating variable  | Far transfer             |                                                       |          |                                                          |          | .338                                                                     | 5.340*** |
| Goodness of fit     |                          | F=10.728***, R <sup>2</sup> =.411<br>(Adjusted, .373) |          | F= 7.229***,<br>R <sup>2</sup> =.320<br>(Adjusted,.276), |          | F=9.131***,<br>R <sup>2</sup> =.387(Adjusted,.345)<br>$\Delta R^2$ =.067 |          |

\* p&lt;.05, \*\* p&lt;.01, \*\*\* p&lt;.001



&lt;Table S8&gt; Results of the Mediating Effect of Far Learning Transfer on Problem-solving Competency (n=279)

|                     | Model                    | Level 1                                            |          | Level 2                                            |          | Level 3                                                            |         |
|---------------------|--------------------------|----------------------------------------------------|----------|----------------------------------------------------|----------|--------------------------------------------------------------------|---------|
|                     |                          | B                                                  | t        | B                                                  | t        | B                                                                  | t       |
|                     | (Constant)               |                                                    | 1.000    |                                                    | 3.319    |                                                                    | 3.201   |
| Control variable    | Sex (Male_dum)           | -.093                                              | -1.556   | -.067                                              | -1.023   | -.053                                                              | -.814   |
|                     | Age                      | .006                                               | .120     | -.029                                              | -.500    | -.030                                                              | -.520   |
|                     | Training level           | .040                                               | .707     | .095                                               | 1.554    | .089                                                               | 1.468   |
|                     | Work experience          | -.129                                              | -2.413*  | -.104                                              | -1.799   | -.085                                                              | -1.467  |
|                     | Training experience      | .092                                               | 1.763    | .025                                               | .449     | .012                                                               | .211    |
|                     | Monthly income           | .140                                               | 2.001*   | .106                                               | 1.395    | .085                                                               | 1.123   |
|                     | Training point           | -.094                                              | -1.863   | -.027                                              | -.493    | -.013                                                              | -.241   |
|                     | Work type (Facility_dum) | .119                                               | 1.620    | .066                                               | .826     | .049                                                               | .608    |
| Antecedent variable | Learning motivation      | .023                                               | .387     | -.140                                              | -2.177*  | -.143                                                              | -2.245* |
|                     | Self-efficacy            | .125                                               | 1.938    | .248                                               | 3.557*** | .230                                                               | 3.295** |
|                     | Training content         | -.069                                              | -1.027   | -.024                                              | -.335    | -.014                                                              | -.197   |
|                     | Training method          | .152                                               | 2.080*   | -.095                                              | -1.206   | -.118                                                              | -1.486  |
|                     | Role of instructor       | .168                                               | 2.172*   | .190                                               | 2.261*   | .165                                                               | 1.964   |
|                     | Manager support          | -.086                                              | -1.150   | .102                                               | 1.257    | .114                                                               | 1.420   |
|                     | Peer support             | .121                                               | 1.863    | .020                                               | .285     | .002                                                               | .033    |
|                     | Transfer opportunity     | .122                                               | 1.945    | .167                                               | 2.454*   | .149                                                               | 2.191*  |
|                     | Transfer intention       | .370                                               | 5.609*** | .223                                               | 3.117**  | .169                                                               | 2.243*  |
| Mediating variable  | Far transfer             |                                                    |          |                                                    |          | .147                                                               | 2.204*  |
| Goodness of fit     |                          | F=10.728***, R <sup>2</sup> =.411 (Adjusted, .373) |          | F= 6.819***, R <sup>2</sup> =.308 (Adjusted,.262), |          | F=6.805***, R <sup>2</sup> =.320(Adjusted,.273) $\Delta R^2$ =.013 |         |

\* p&lt;.05, \*\* p&lt;.01, \*\*\* p&lt;.001

&lt;Table S9&gt; Results of the Mediating Effect of Far Learning Transfer on Self-development Competency (n=279)

| Model               |                          | Level 1                                            |          | Level 2                                            |          | Level 3                                                            |          |
|---------------------|--------------------------|----------------------------------------------------|----------|----------------------------------------------------|----------|--------------------------------------------------------------------|----------|
|                     |                          | B                                                  | t        | B                                                  | t        | B                                                                  | t        |
| (Constant)          |                          |                                                    | 1.000    |                                                    | .666     |                                                                    | .468     |
| Control variable    | Sex (Male_dum)           | -.093                                              | -1.556   | -.213                                              | -3.437** | -.193                                                              | -3.163** |
|                     | Age                      | .006                                               | .120     | .071                                               | 1.308    | .070                                                               | 1.309    |
|                     | Training level           | .040                                               | .707     | .130                                               | 2.242*   | .122                                                               | 2.136*   |
|                     | Work experience          | -.129                                              | -2.413*  | -.050                                              | -.904    | -.022                                                              | -.408    |
|                     | Training experience      | .092                                               | 1.763    | .101                                               | 1.887    | .082                                                               | 1.544    |
|                     | Monthly income           | .140                                               | 2.001*   | .200                                               | 2.768**  | .170                                                               | 2.383**  |
|                     | Training point           | -.094                                              | -1.863   | .014                                               | .272     | .034                                                               | .666     |
|                     | Work type (Facility_dum) | .119                                               | 1.620    | .246                                               | 3.239**  | .221                                                               | 2.948**  |
| Antecedent variable | Learning motivation      | .023                                               | .387     | .156                                               | 2.561*   | .151                                                               | 2.530*   |
|                     | Self-efficacy            | .125                                               | 1.938    | .142                                               | 2.140*   | .115                                                               | 1.762    |
|                     | Training content         | -.069                                              | -1.027   | -.046                                              | -.668    | -.032                                                              | -.463    |
|                     | Training method          | .152                                               | 2.080*   | -.187                                              | -2.493*  | -.220                                                              | -2.958** |
|                     | Role of instructor       | .168                                               | 2.172*   | .051                                               | .637     | .015                                                               | .190     |
|                     | Manager support          | -.086                                              | -1.150   | .008                                               | .098     | .026                                                               | .341     |
|                     | Peer support             | .121                                               | 1.863    | .271                                               | 4.063*** | .246                                                               | 3.727*** |
|                     | Transfer opportunity     | .122                                               | 1.945    | .116                                               | 1.795    | .090                                                               | 1.411    |
|                     | Transfer intention       | .370                                               | 5.609*** | .275                                               | 4.042*** | .196                                                               | 2.777**  |
| Mediating variable  | Far transfer             |                                                    |          |                                                    |          | .213                                                               | 3.409**  |
| Goodness of fit     |                          | F=10.728***, R <sup>2</sup> =.411 (Adjusted, .373) |          | F= 9.175***, R <sup>2</sup> =.374 (Adjusted,.333), |          | F=9.663***, R <sup>2</sup> =.401(Adjusted,.359) $\Delta R^2$ =.027 |          |

\* p&lt;.05, \*\* p&lt;.01, \*\*\* p&lt;.001

&lt;Table S10&gt; Results of the Mediating Effect of Far Learning Transfer on Interpersonal Relationship Competency (n=279)

| Model               |                          | Level 1                                            |          | Level 2                                            |           | Level 3                                                            |           |
|---------------------|--------------------------|----------------------------------------------------|----------|----------------------------------------------------|-----------|--------------------------------------------------------------------|-----------|
|                     |                          | B                                                  | t        | B                                                  | t         | B                                                                  | t         |
|                     | (Constant)               |                                                    | 1.000    |                                                    | 1.119     |                                                                    | .955      |
| Control variable    | Sex (Male_dum)           | -.093                                              | -1.556   | -.251                                              | -4.094*** | -.234                                                              | -3.856*** |
|                     | Age                      | .006                                               | .120     | -.019                                              | -.352     | -.020                                                              | -.378     |
|                     | Training level           | .040                                               | .707     | .136                                               | 2.377*    | .129                                                               | 2.282*    |
|                     | Work experience          | -.129                                              | -2.413*  | -.072                                              | -1.320    | -.049                                                              | -.899     |
|                     | Training experience      | .092                                               | 1.763    | .082                                               | 1.539     | .065                                                               | 1.239     |
|                     | Monthly income           | .140                                               | 2.001*   | .124                                               | 1.728     | .099                                                               | 1.386     |
|                     | Training point           | -.094                                              | -1.863   | -.002                                              | -.034     | .015                                                               | .296      |
|                     | Work type (Facility_dum) | .119                                               | 1.620    | .261                                               | 3.465**   | .239                                                               | 3.209**   |
| Antecedent variable | Learning motivation      | .023                                               | .387     | .080                                               | 1.321     | .076                                                               | 1.270     |
|                     | Self-efficacy            | .125                                               | 1.938    | .132                                               | 2.011*    | .109                                                               | 1.682     |
|                     | Training content         | -.069                                              | -1.027   | .051                                               | .743      | .063                                                               | .934      |
|                     | Training method          | .152                                               | 2.080*   | -.023                                              | -.308     | -.050                                                              | -.676     |
|                     | Role of instructor       | .168                                               | 2.172*   | -.005                                              | -.063     | -.035                                                              | -.447     |
|                     | Manager support          | -.086                                              | -1.150   | .047                                               | .620      | .063                                                               | .831      |
|                     | Peer support             | .121                                               | 1.863    | .215                                               | 3.256**   | .194                                                               | 2.950**   |
|                     | Transfer opportunity     | .122                                               | 1.945    | .044                                               | .685      | .022                                                               | .346      |
|                     | Transfer intention       | .370                                               | 5.609*** | .295                                               | 4.382***  | .229                                                               | 3.254**   |
| Mediating variable  | Far transfer             |                                                    |          |                                                    |           | .179                                                               | 2.874**   |
| Goodness of fit     |                          | F=10.728***, R <sup>2</sup> =.411 (Adjusted, .373) |          | F= 9.709***, R <sup>2</sup> =.387 (Adjusted,.347), |           | F=9.883***, R <sup>2</sup> =.406(Adjusted,.365) $\Delta R^2$ =.019 |           |

\* p&lt;.05, \*\* p&lt;.01, \*\*\* p&lt;.001

&lt;Table S11&gt; Results of the Mediating Effect of Far Learning Transfer on Skill Competency (n=279)

|                     | Model                    | Level 1                               |          | Level 2                               |          | Level 3                                     |        |
|---------------------|--------------------------|---------------------------------------|----------|---------------------------------------|----------|---------------------------------------------|--------|
|                     |                          | B                                     | t        | B                                     | t        | B                                           | t      |
|                     | (Constant)               |                                       | 1.000    |                                       | 2.726    |                                             | 2.543  |
| Control variable    | Sex (Male_dum)           | -.093                                 | -1.556   | -.109                                 | -1.667   | -.082                                       | -1.296 |
|                     | Age                      | .006                                  | .120     | .039                                  | .680     | .037                                        | .670   |
|                     | Training level           | .040                                  | .707     | .093                                  | 1.509    | .081                                        | 1.368  |
|                     | Work experience          | -.129                                 | -2.413*  | -.069                                 | -1.184   | -.032                                       | -.564  |
|                     | Training experience      | .092                                  | 1.763    | -.049                                 | -.863    | -.075                                       | -1.363 |
|                     | Monthly income           | .140                                  | 2.001*   | .077                                  | 1.003    | .037                                        | .490   |
|                     | Training point           | -.094                                 | -1.863   | .027                                  | .485     | .053                                        | 1.001  |
|                     | Work type (Facility_dum) | .119                                  | 1.620    | .078                                  | .966     | .044                                        | .557   |
| Antecedent variable | Learning motivation      | .023                                  | .387     | .042                                  | .645     | .035                                        | .562   |
|                     | Self-efficacy            | .125                                  | 1.938    | .167                                  | 2.381*   | .131                                        | 1.923  |
|                     | Training content         | -.069                                 | -1.027   | -.066                                 | -.895    | -.046                                       | -.646  |
|                     | Training method          | .152                                  | 2.080*   | .112                                  | 1.403    | .068                                        | .880   |
|                     | Role of instructor       | .168                                  | 2.172*   | .081                                  | .961     | .033                                        | .400   |
|                     | Manager support          | -.086                                 | -1.150   | .143                                  | 1.754    | .167                                        | 2.121* |
|                     | Peer support             | .121                                  | 1.863    | -.053                                 | -.747    | -.087                                       | -1.270 |
|                     | Transfer opportunity     | .122                                  | 1.945    | .035                                  | .507     | .000                                        | -.004  |
|                     | Transfer intention       | .370                                  | 5.609*** | .265                                  | 3.684*** | .159                                        | 2.161* |
| Mediating variable  | Far transfer             |                                       |          |                                       | .286     | 4.385***                                    |        |
| Goodness of fit     |                          | F=10.728***, R²=.411 (Adjusted, .373) |          | F= 6.563***, R²=.299 (Adjusted,.254), |          | F=7.700***, R²=.348(Adjusted,.303) ΔR²=.048 |        |

\* p&lt;.05, \*\* p&lt;.01, \*\*\* p&lt;.001

&lt;Table S12&gt; Results of the Mediating Effect of Far Learning Transfer on Work Ethics Competency (n=279)

| Model               |                          | Level 1                                            |          | Level 2                                            |         | Level 3                                                            |          |
|---------------------|--------------------------|----------------------------------------------------|----------|----------------------------------------------------|---------|--------------------------------------------------------------------|----------|
|                     |                          | B                                                  | t        | B                                                  | t       | B                                                                  | t        |
|                     | (Constant)               |                                                    | 1.000    |                                                    | 6.824   |                                                                    | 6.724    |
| Control variable    | Sex (Male_dum)           | -.093                                              | -1.556   | -.031                                              | -.459   | -.015                                                              | -.229    |
|                     | Age                      | .006                                               | .120     | .078                                               | 1.318   | .077                                                               | 1.313    |
|                     | Training level           | .040                                               | .707     | .067                                               | 1.070   | .061                                                               | .973     |
|                     | Work experience          | -.129                                              | -2.413   | .107                                               | 1.785   | .128                                                               | 2.138*   |
|                     | Training experience      | .092                                               | 1.763    | -.151                                              | -2.596* | -.167                                                              | -2.866** |
|                     | Monthly income           | .140                                               | 2.001    | .125                                               | 1.594   | .102                                                               | 1.300    |
|                     | Training point           | -.094                                              | -1.863   | -.073                                              | -1.300  | -.058                                                              | -1.027   |
|                     | Work type (Facility_dum) | .119                                               | 1.620    | .022                                               | .262    | .002                                                               | .022     |
| Antecedent variable | Learning motivation      | .023                                               | .387     | .164                                               | 2.483*  | .161                                                               | 2.447*   |
|                     | Self-efficacy            | .125                                               | 1.938    | -.093                                              | -1.297  | -.114                                                              | -1.587   |
|                     | Training content         | -.069                                              | -1.027   | -.067                                              | -.894   | -.056                                                              | -.747    |
|                     | Training method          | .152                                               | 2.080*   | .024                                               | .288    | -.002                                                              | -.020    |
|                     | Role of instructor       | .168                                               | 2.172*   | -.099                                              | -1.143  | -.127                                                              | -1.465   |
|                     | Manager support          | -.086                                              | -1.150   | .057                                               | .685    | .072                                                               | .861     |
|                     | Peer support             | .121                                               | 1.863    | .147                                               | 2.027*  | .127                                                               | 1.756    |
|                     | Transfer opportunity     | .122                                               | 1.945    | .135                                               | 1.922   | .115                                                               | 1.637    |
|                     | Transfer intention       | .370                                               | 5.609*** | .249                                               | 3.363** | .187                                                               | 2.415*   |
| Mediating variable  | Far transfer             |                                                    |          |                                                    |         | .166                                                               | 2.414*   |
| Goodness of fit     |                          | F=10.728***, R <sup>2</sup> =.411 (Adjusted, .373) |          | F= 5.437***, R <sup>2</sup> =.262 (Adjusted,.213), |         | F=5.554***, R <sup>2</sup> =.278(Adjusted,.223) $\Delta R^2$ =.016 |          |

\* p&lt;.05, \*\* p&lt;.01, \*\*\* p&lt;.001
